# Supplementary material for: The Genetic Landscape of Mitochondrial Diseases in Spain: A Nationwide Call
Source: Genes (Basel). 2021 Oct 9;12(10):1590. doi: 10.3390/genes12101590 (PMC8535857; doi:10.3390/genes12101590)
Supplement: Supplementary file 1 [file genes-12-01590-s001.zip › Supplementary Table S2.xlsx]

## Sheet: nDNA
Gene	Biological role	Pediatric cases	Adult cases	Age not available
AARS2	mt-tRNA biogenesis/aminoacylation	1
ABAT	Nucleotide pools	1
ABCB7	Fe-S cluster biogenesis
ACAD9	Oxphos Assembly factors	8
ACO2	TCA cycle metabolism	1
AFG3L2	Protein quality control
AGK	Protein import/processing	1
AIFM1	Protein import/processing
ALDH18A1	TCA cycle metabolism	1
APOPT1	Oxphos Assembly factors
ATAD3A (AD)	Lipid homeostasis	1
ATAD3A (AR)	Lipid homeostasis	3
ATP5A1	Oxphos subunits
ATP5E	Oxphos subunits
ATPAF2	Oxphos Assembly factors	2
BCS1L	Oxphos Assembly factors	4
BOLA3	Fe-S cluster biogenesis
C12orf65	Translation	2
C19orf12	Unclear function
C19orf70 (QIL1)	Mitochondrial morphology
C1QBP	Mitoribosome biogenesis
CARS2	mt-tRNA biogenesis/aminoacylation	1
CEP89	Unclear function
CHCHD10	Mitochondrial morphology
CHKB	Lipid homeostasis	3
CLPB	Protein quality control
CLPP	Protein quality control
COA3	Oxphos Assembly factors
COA5	Oxphos Assembly factors
COA6	Oxphos Assembly factors
COA7	Oxphos Assembly factors
COASY	Enzyme cofactors
COQ2	Electron Carriers (CoQ10)	3
COQ4	Electron Carriers (CoQ10)	4
COQ5	Electron Carriers (CoQ10)
COQ6	Electron Carriers (CoQ10)
COQ7	Electron Carriers (CoQ10)	3
COQ8A	Electron Carriers (CoQ10)	2
COQ8B	Electron Carriers (CoQ10)	1
COQ9	Electron Carriers (CoQ10)
COX10	Oxphos Assembly factors
COX14	Oxphos Assembly factors
COX15	Oxphos Assembly factors	1
COX20	Oxphos Assembly factors
COX4I1	Oxphos subunits	1
COX4I2	Oxphos subunits
COX5A	Oxphos subunits
COX6A1	Oxphos subunits
COX6B1	Oxphos subunits
COX7B	Oxphos subunits	1
COX8A	Oxphos subunits
CYC1	Oxphos subunits
CYCS	Electron Carriers (CytC)
D2HGDH	Metabolic repair	2
DARS2	mt-tRNA biogenesis/aminoacylation	1
DGUOK	Nucleotide pools	7
DLAT	TCA cycle metabolism
DLD	TCA cycle metabolism	2
DNA2	mtDNA homeostasis	1
DNAJC19	Protein import/processing	1
DNM1L (AD)	Mitochondrial morphology	1		1
EARS2	mt-tRNA biogenesis/aminoacylation	3
ECHS1	Metabolic repair	8
ELAC2	mtRNA expression/processing
ERAL1	Mitoribosome biogenesis
ETHE1	Metabolic repair	6
FARS2	mt-tRNA biogenesis/aminoacylation	8
FASTKD2	mtRNA expression/processing
FBXL4	Protein quality control	3
FDX1L	Fe-S cluster biogenesis
FDXR	Fe-S cluster biogenesis	3
FH	TCA cycle metabolism	1
FLAD1	Enzyme cofactors
FOXRED1	Oxphos Assembly factors	2
FXN	Fe-S cluster biogenesis
GARS	mt-tRNA biogenesis/aminoacylation
GDAP1	Mitochondrial morphology
GFER	Protein import/processing	1
GFM1	Translation	6
GFM2	Translation
GLRX5	Fe-S cluster biogenesis
GTPBP3	mt-tRNA biogenesis/aminoacylation	3
HAAO	TCA cycle metabolism
HARS2	mt-tRNA biogenesis/aminoacylation	3
HCCS	Electron carriers (CytC)
HIBCH	Metabolic repair	5
HSD17B10	mtRNA expression/processing	5	5
HSPD1	Protein quality control	1
HTRA2	Autophagy/apoptosis
IARS2	mt-tRNA biogenesis/aminoacylation	1
IBA57	Fe-S cluster biogenesis
IDH3A	TCA cycle metabolism
IDH3B	TCA cycle metabolism
ISCA2	Fe-S cluster biogenesis
ISCU	Fe-S cluster biogenesis
KARS	mt-tRNA biogenesis/aminoacylation	4	1
KYNU	TCA cycle metabolism
L2HGDH	Metabolic repair	2
LARS2	mt-tRNA biogenesis/aminoacylation	2
LIAS	Enzyme cofactors
LIPT1	Enzyme cofactors	3
LIPT2	Enzyme cofactors
LONP1	Protein quality control
LRPPRC	mtRNA expression/processing	1
LYRM4	Fe-S cluster biogenesis
LYRM7	Oxphos Assembly factors	3
MARS2	mt-tRNA biogenesis/aminoacylation
MDH2	TCA cycle metabolism
MECR	TCA cycle metabolism
MFF	Mitochondrial morphology
MFN2 (AD)	Mitochondrial morphology		1
MFN2 (AR)	Mitochondrial morphology	1
MGME1	mtDNA homeostasis
MICU1	Metabolite transport
MICU2	Metabolite transport
MIPEP	Protein import/processing
MPC1	Metabolite transport
MPV17	Nucleotide pools	2
MRM2	mtRNA expression/processing
MRPL12	Mitoribosome biogenesis
MRPL3	Mitoribosome biogenesis
MRPL44	Mitoribosome biogenesis
MRPS16	Mitoribosome biogenesis
MRPS22	Mitoribosome biogenesis	1
MRPS23	Mitoribosome biogenesis
MRPS34	Mitoribosome biogenesis
MRPS7	Mitoribosome biogenesis	1
MSTO1	Mitochondrial morphology	4
MTFMT	mt-tRNA biogenesis/aminoacylation
MTO1	mt-tRNA biogenesis/aminoacylation
MTPAP	mtRNA expression/processing
NADK2	TCA cycle metabolism	1
NARS2	mt-tRNA biogenesis/aminoacylation	1
NAXE	Metabolic repair	1
NDUFA1	Oxphos subunits	6	1
NDUFA10	Oxphos subunits
NDUFA11	Oxphos subunits
NDUFA12	Oxphos subunits
NDUFA13	Oxphos subunits	1
NDUFA2	Oxphos subunits
NDUFA4	Oxphos subunits
NDUFA8	Oxphos subunits	3
NDUFA9	Oxphos subunits
NDUFAF1	Oxphos Assembly factors
NDUFAF2	Oxphos Assembly factors	1
NDUFAF3	Oxphos Assembly factors
NDUFAF4	Oxphos Assembly factors	2
NDUFAF5	Oxphos Assembly factors
NDUFAF6	Oxphos Assembly factors		1
NDUFB10	Oxphos subunits
NDUFB11	Oxphos subunits	1
NDUFB3	Oxphos subunits	1
NDUFB9	Oxphos subunits
NDUFS1	Oxphos subunits	4
NDUFS2	Oxphos subunits
NDUFS3	Oxphos subunits
NDUFS4	Oxphos subunits	2
NDUFS6	Oxphos subunits
NDUFS7	Oxphos subunits
NDUFS8	Oxphos subunits
NDUFV1	Oxphos subunits	5
NDUFV2	Oxphos subunits	1
NFS1	Fe-S cluster biogenesis
NFU1	Fe-S cluster biogenesis	28
NSUN3	mt-tRNA biogenesis/aminoacylation
NUBPL	Oxphos Assembly factors
OPA1 (AD)	Mitochondrial morphology	10	16
OPA3	Lipid homeostasis
OXA1L	Oxphos Assembly factors	1
PANK2	Enzyme cofactors
PARS2	mt-tRNA biogenesis/aminoacylation	1
PDHA1	TCA cycle metabolism	42
PDHB	TCA cycle metabolism	3
PDHX	TCA cycle metabolism	2
PDK3	TCA cycle metabolism
PDP1	TCA cycle metabolism
PDSS1	Electron Carriers (CoQ10)	1
PDSS2	Electron Carriers (CoQ10)
PET100	Oxphos Assembly factors
PET117	Oxphos Assembly factors
PLA2G6	Lipid homeostasis
PMPCA	Protein import/processing
PNPLA4	Lipid homeostasis
PNPLA8	Lipid homeostasis	1
PNPT1	mtRNA expression/processing	3
POLG (AD)	mtDNA homeostasis	1	7
POLG (AR)	mtDNA homeostasis	15	14
POLG2	mtDNA homeostasis
PPA2	TCA cycle metabolism
PUS1	mt-tRNA biogenesis/aminoacylation	2
QRSL1	mt-tRNA biogenesis/aminoacylation
RARS2	mt-tRNA biogenesis/aminoacylation	2
RMND1	Translation	4
RNASEH1	mtDNA homeostasis		1
RRM2B (AD)	Nucleotide pools	1	1
RRM2B (AR)	Nucleotide pools	2	3
RTN4IP1	Unclear function
SACS	Mitochondrial morphology
SAMHD1	Nucleotide pools
SARS2	mt-tRNA biogenesis/aminoacylation	3
SCO1	Oxphos Assembly factors
SCO2	Oxphos Assembly factors
SDHA	Oxphos subunits	2
SDHAF1	Oxphos Assembly factors
SDHB	Oxphos subunits
SDHD	Oxphos subunits
SERAC1	Lipid homeostasis	3
SFXN4	Fe-S cluster biogenesis
SHMT2	Enzyme cofactors	3
SLC19A2	Metabolite transport
SLC19A3	Metabolite transport	8
SLC25A1	Metabolite transport	1
SLC25A12	Metabolite transport
SLC25A19	Metabolite transport
SLC25A24	Metabolite transport
SLC25A26	Metabolite transport
SLC25A3	Metabolite transport
SLC25A32	Metabolite transport
SLC25A4 (AD)	Metabolite transport	1
SLC25A4 (AR)	Metabolite transport	2
SLC25A42	Metabolite transport
SLC25A46	Mitochondrial morphology
SLC39A8	Metabolite transport
SPG7 (AD)	Protein quality control	2
SPG7 (AR)	Protein quality control	1	8	1
STAT2	Mitochondrial morphology
SUCLA2	Nucleotide pools	2
SUCLG1	Nucleotide pools	4
SURF1	Oxphos Assembly factors	3
TACO1	Translation
TARS2	mt-tRNA biogenesis/aminoacylation
TAZ	Lipid homeostasis	4		1
TFAM	mtDNA homeostasis
TIMM22	Protein import/processing	1
TIMM50	Protein import/processing	1
TIMM8A	Protein import/processing	3
TIMMDC1	Oxphos Assembly factors
TK2	Nucleotide pools	22	21
TMEM126B	Oxphos Assembly factors
TMEM65	Autophagy/apoptosis & Protein import/processing
TMEM70	Oxphos Assembly factors	9
TPK1	Enzyme cofactors
TRAK1	Mitochondrial morphology
TRIT1	mt-tRNA biogenesis/aminoacylation
TRMT10C	mtRNA expression/processing
TRMT5	mt-tRNA biogenesis/aminoacylation
TRMU	mt-tRNA biogenesis/aminoacylation	6
TRNT1	mt-tRNA biogenesis/aminoacylation
TSFM	Translation	2
TTC19	Oxphos Assembly factors
TUFM	Translation	1
TWNK (AD)	mtDNA homeostasis	1	13
TWNK (AR)	mtDNA homeostasis	3	1
TXN2	Metabolic repair
TYMP	Nucleotide pools	1	23
UQCC2	Oxphos Assembly factors
UQCC3	Oxphos Assembly factors
UQCRB	Oxphos subunits
UQCRC2	Oxphos subunits
UQCRQ	Oxphos subunits	1
VARS2	mt-tRNA biogenesis/aminoacylation	2
VPS13C	Autophagy/apoptosis	1
WARS2	mt-tRNA biogenesis/aminoacylation
YARS2	mt-tRNA biogenesis/aminoacylation		3
YME1L1	Protein quality control

## Sheet: mtDNA
Gene:mutation	Biological role	Pediatric cases	Adult cases	Age not available
Single large-scale mtDNA deletion		83	235
MT-ATP6:m.8579C>T	Oxphos subunits	1	0
MT-ATP6:m.8618_8619insT	Oxphos subunits	0	1
MT-ATP6:m.8630A>G	Oxphos subunits	1	0
MT-ATP6:m.8716dupT	Oxphos subunits	0	1
MT-ATP6:m.8719G>A	Oxphos subunits	1	0
MT-ATP6:m.8839G>C	Oxphos subunits	2	1
MT-ATP6:m.8969G>C	Oxphos subunits	1	0
MT-ATP6:m.8993T>C	Oxphos subunits	11	0
MT-ATP6:m.8993T>G	Oxphos subunits	21	6
MT-ATP6:m.9025G>A	Oxphos subunits	1	0
MT-ATP6:m.9029A>G	Oxphos subunits	0	3
MT-ATP6:m.9032T>C	Oxphos subunits	1	1	2
MT-ATP6:m.9035T>C	Oxphos subunits	0	0	1
MT-ATP6:m.9124A>G	Oxphos subunits	0	1
MT-ATP6:m.9176T>C	Oxphos subunits	9	0
MT-ATP6:m.9185T>C	Oxphos subunits	1	3
MT-ATP6:m.9191T>C	Oxphos subunits	1	0
MT-ATP6:m.9203_9204delAT	Oxphos subunits	1	0
MT-ATP8:m.8391G>A	Oxphos subunits	0	1
MT-ATP8:m.8403T>C	Oxphos subunits	0	1
MT-ATP8:m.8412T>C	Oxphos subunits	1	0
MT-ATP8:m.8424T>C	Oxphos subunits	0	5
MT-CO1:m.6015T>C	Oxphos subunits	0	1
MT-CO1:m.6489C>A	Oxphos subunits	1	0
MT-CO1:m.6955G>A	Oxphos subunits	1	0
MT-CO1:m.5992G>A	Oxphos subunits	0	1
MT-CO2:m.7965T>A	Oxphos subunits	0	1
MT-CO3:m.9333C>T	Oxphos subunits	0	2
MT-CO3:m.9957T>C	Oxphos subunits	0	1
MT-CYB:m.15257G>A	Oxphos subunits	0	1
MT-CYB:m.15533A>G	Oxphos subunits	1	0
MT-ND1:m.3308T>C	Oxphos subunits	1	1
MT-ND1:m.3460G>A	Oxphos subunits	28	20
MT-ND1:m.3472T>C	Oxphos subunits	0	1
MT-ND1:m.3688G>A	Oxphos subunits	0	1
MT-ND1:m.3697G>A	Oxphos subunits	2	0
MT-ND1:m.3700G>A	Oxphos subunits	3	0
MT-ND1:m.3710C>T	Oxphos subunits	1	0
MT-ND1:m.3734A>G	Oxphos subunits	0	9
MT-ND1:m.3890G>A	Oxphos subunits	0	1
MT-ND1:m.3914G>A	Oxphos subunits	0	1
MT-ND1:m.3946G>A	Oxphos subunits	1	0
MT-ND3:m.10158T>C	Oxphos subunits	3	0
MT-ND3:m.10197G>A	Oxphos subunits	2	3
MT-ND4:m.11232T>C	Oxphos subunits	1	0
MT-ND4:m.11253T>C	Oxphos subunits	0	2
MT-ND4:m.11778G>A	Oxphos subunits	17	109	2
MT-ND5:m.12706T>C	Oxphos subunits	0	2
MT-ND5:m.13042G>A	Oxphos subunits	0	1
MT-ND5:m.13045A>G	Oxphos subunits	0	1
MT-ND5:m.13046T>C	Oxphos subunits	0	1
MT-ND5:m.13094T>C	Oxphos subunits	1	0
MT-ND5:m.13340T>C	Oxphos subunits	0	1
MT-ND5:m.13513G>A	Oxphos subunits	15	5
MT-ND5:m.13514A>G	Oxphos subunits	2	0	0
MT-ND6:m.14279G>A	Oxphos subunits	0	1
MT-ND6:m.14453G>A	Oxphos subunits	1	0
MT-ND6:m.14459G>A	Oxphos subunits	6	1
MT-ND6:m.14484T>C	Oxphos subunits	5	41
MT-ND6:m.14487T>C	Oxphos subunits	8	1
MT-ND6:m.14495A>G	Oxphos subunits	1	0
MT-TA:m.5591G>A	mt-tRNA biogenesis/aminoacylation	0	1
MT-TA:m.5628T>C	mt-tRNA biogenesis/aminoacylation	1	1
MT-TA:m.5636T>C	mt-tRNA biogenesis/aminoacylation	0	1
MT-TC:m.5803C>A	mt-tRNA biogenesis/aminoacylation	0	4
MT-TE:m.14674T>C	mt-tRNA biogenesis/aminoacylation	1	0
MT-TG:m.10000G>A	mt-tRNA biogenesis/aminoacylation	0	1
MT-TG:m.10010T>C	mt-tRNA biogenesis/aminoacylation	2	3
MT-TG:m.10058A>C	mt-tRNA biogenesis/aminoacylation	0	1
MT-TH:m.12147G>A	mt-tRNA biogenesis/aminoacylation	0	1
MT-TI:m.4309G>A	mt-tRNA biogenesis/aminoacylation	0	1
MT-TK:m.8317T>C	mt-tRNA biogenesis/aminoacylation	0	1
MT-TK:m.8344A>G	mt-tRNA biogenesis/aminoacylation	10	16
MT-TK:m.8356T>C	mt-tRNA biogenesis/aminoacylation	0	1
MT-TK:m.8357T>C	mt-tRNA biogenesis/aminoacylation	0	3
MT-TK:m.8363G>A	mt-tRNA biogenesis/aminoacylation	1	1
MT-TL1:m.3243A>G	mt-tRNA biogenesis/aminoacylation	96	180
MT-TL1:m.3250T>C	mt-tRNA biogenesis/aminoacylation	0	1
MT-TL1:m.3256C>T	mt-tRNA biogenesis/aminoacylation	0	2
MT-TL1:m.3258A>G	mt-tRNA biogenesis/aminoacylation	0	1
MT-TL1:m.3260A>G	mt-tRNA biogenesis/aminoacylation	0	2
MT-TL1:m.3271T>C	mt-tRNA biogenesis/aminoacylation	1	1	1
MT-TL1:m.3273T>C	mt-tRNA biogenesis/aminoacylation	0	1
MT-TL1:m.3280A>G	mt-tRNA biogenesis/aminoacylation	0	2
MT-TL1:m.3283G>A	mt-tRNA biogenesis/aminoacylation	0	1
MT-TL1:m.3300T>C	mt-tRNA biogenesis/aminoacylation	0	1
MT-TL1:m.3303C>T	mt-tRNA biogenesis/aminoacylation	1	1
MT-TL2:m.12293G>A	mt-tRNA biogenesis/aminoacylation	0	1
MT-TL2:m.12300G>A	mt-tRNA biogenesis/aminoacylation	2	0
MT-TN:m.5688T>C	mt-tRNA biogenesis/aminoacylation	0	1
MT-TN:m.5692T>C	mt-tRNA biogenesis/aminoacylation	0	1
MT-TN:m.5698G>A	mt-tRNA biogenesis/aminoacylation	0	1
MT-TN:m.5702A>G	mt-tRNA biogenesis/aminoacylation	0	1
MT-TN:m.5728T>C	mt-tRNA biogenesis/aminoacylation	0	1
MT-TP:m.6015T>C	mt-tRNA biogenesis/aminoacylation	0	1
MT-TR:m.10440T>C	mt-tRNA biogenesis/aminoacylation	1	0
MT-TS1:m.7445A>G	mt-tRNA biogenesis/aminoacylation	2	1
MT-TS1:m.7453G>A	mt-tRNA biogenesis/aminoacylation	0	1
MT-TS1:m.7472_7473insC	mt-tRNA biogenesis/aminoacylation	1	0
MT-TS1:m.7497G>A	mt-tRNA biogenesis/aminoacylation	0	1
MT-TS1:m.7510T>C	mt-tRNA biogenesis/aminoacylation	5	1	16
MT-TS1:m.7511T>C	mt-tRNA biogenesis/aminoacylation	3	1
MT-TT:m.15923A>G	mt-tRNA biogenesis/aminoacylation	0	1
MT-TV:m.1638T>C	mt-tRNA biogenesis/aminoacylation	2	0
MT-TW:m.5521G>A	mt-tRNA biogenesis/aminoacylation	0	1
MT-TW:m.5537_5538insT	mt-tRNA biogenesis/aminoacylation	1	3
MT-TW:m.5541C>T	mt-tRNA biogenesis/aminoacylation	0	1
Gene:mutation	Biological role	Pediatric cases	Adult cases	Age not available
MT-RNR1:m.1555A>G	Mitoribosome biogenesis	460	362	310
MT-RNR1:m.1494C>T	Mitoribosome biogenesis	4	4	8
